# Supplementary material
Source: Research Square preprint supplement (doi:10.21203/rs.3.rs-9407354/v1)
Supplement: Supplementary file 1 [file 1adb420690dc8d13677ef631.xlsx]

## Sheet: ResultsとTable 1の修正提案
Table 1: Clinical and Electrographic Characteristics of the Patient Cohort
Patient ID	Age (yr)	Sex	Seizure Type	Visually Identified Focus (Bipolar)	Anatomical Region	Continuous Sub-cohort
chb01	11	F	Focal	P8-O2	Right-Posterior	Yes
chb02	11	M	Focal	P7-O1	Left-Posterior	Yes
chb03	14	F	Focal	FP1-F3	Left-Anterior	Yes
chb04	22	M	Focal	P8-O2	Right-Posterior	Yes
chb06	1.5	F	Focal	P3-O1	Left-Posterior	Yes
chb07	14.5	F	Focal	FP1-F3	Left-Anterior	Yes
chb08	3.5	M	Focal	F3-C3	Left-Anterior / Central	Yes
chb09	10	F	Focal	P8-O2	Right-Posterior	Yes
chb10	3	M	Focal	P8-O2	Right-Posterior	Yes
chb11	12	F	Focal	C4-P4	Right-Central / Posterior	No
chb12	2	F	Focal	F3-C3	Left-Anterior / Central	Yes
chb13	3	F	Focal	P3-O1	Left-Posterior	No
chb14	9	F	Focal	P8-O2	Right-Posterior	No
chb16	7	F	Focal	P3-O1	Left-Posterior	Yes
chb21	13	F	Focal	P4-O2	Right-Posterior	Yes
chb22	22	F	Focal	P3-O1	Left-Posterior	Yes
Total / Mean	9.9 ± 6.6	12F/4M	100% Focal			13 (81.3%)
Note: Continuous Sub-cohort refers to patients with artifact-free 60-second preictal EEG available for longitudinal analysis.
